# Supplementary material for: Which training model has the best effect on adipo-myokines in men with obesity?
Source: Research Square preprint supplement (doi:10.21203/rs.3.rs-6297875/v1), 2025-07-17
Supplement: Supplementary file 1 [file 45f45152ad9ed8814f008559.docx]

The data that support the findings of this study are available from the corresponding author, [a.saedi@uok.ac.ir], upon reasonable request. The data can be accessed via the provided link: <https://cloud.hsu.ac.ir/s/9NjynEYKJ3sfkib>
